# Supplementary material for: In Vitro Antioxidant and Prooxidant Activities of Red Raspberry (Rubus idaeus L.) Stem Extracts
Source: MDPI journal article supplement (doi:10.3390/molecules27134073), 2022-06-24
Supplement: s1 [file s1]

**Table S1.** Summary of studies on bioactivities of *Rubus idaeus* leaf, stem, and rhizome extracts

| Bioactivities and their research methods                                                                                                                             | Plant material, extractant | Total phenolic content (mean values) | Main/bioactive components   | Evaluation of activity                                                                                                                                                                                                                                                                                                                                                                                                                                                                                                                                                                    | Reference |
|----------------------------------------------------------------------------------------------------------------------------------------------------------------------|----------------------------|--------------------------------------|-----------------------------|-------------------------------------------------------------------------------------------------------------------------------------------------------------------------------------------------------------------------------------------------------------------------------------------------------------------------------------------------------------------------------------------------------------------------------------------------------------------------------------------------------------------------------------------------------------------------------------------|-----------|
| <b>Antioxidant</b><br>DPPH <sup>1</sup><br>phosphomolybdenum assay                                                                                                   | Shoots, chloroform, MeOH   |                                      | Ellagic acid, ellagitannins | Strong antioxidant activity.                                                                                                                                                                                                                                                                                                                                                                                                                                                                                                                                                              | [4]       |
| <b>Antibacterial</b><br>broth microdilution method                                                                                                                   |                            |                                      |                             | Gram-positive bacteria ( $\beta$ -hemolytic <i>Streptococcus</i> group A,B,G, <i>Streptococcus pneumoniae</i> , <i>Corynebacterium diphtheriae</i> , <i>Enterococcus faecalis</i> , <i>Staphylococcus aureus</i> , <i>Staphylococcus epidermidis</i> , <i>Bacillus subtilis</i> , <i>Clostridium sporogenes</i> . Gram-negative bacteria ( <i>Klebsiella pneumoniae</i> , <i>Neisseria meningitidis</i> , <i>Moraxella catarrhalis</i> , <i>Haemophilus influenzae</i> , <i>Helicobacter pylori</i> ), the strongest bactericidal properties against <i>Corynebacterium diphtheriae</i> . |           |
| <b>Cytotoxic</b> (using human dermal fibroblasts, human promyelotic leukemia cell line (HL-60) and human cervical cancer cell line (HeLa)<br>MTT cell viability test |                            |                                      |                             | Higher cytotoxic activity towards the HL-60 cells than HeLa.                                                                                                                                                                                                                                                                                                                                                                                                                                                                                                                              |           |

|                                                                                                                                                   |                                                                                                                               |                                                                                              |                                                                               |                                                                                                                                                                                                         |      |
|---------------------------------------------------------------------------------------------------------------------------------------------------|-------------------------------------------------------------------------------------------------------------------------------|----------------------------------------------------------------------------------------------|-------------------------------------------------------------------------------|---------------------------------------------------------------------------------------------------------------------------------------------------------------------------------------------------------|------|
| <b>Antioxidant</b><br>ORAC <sup>2</sup>                                                                                                           | Leaves, phosphate<br>buffer pH 7.0                                                                                            | 47 – 129<br>mg GAE <sup>3</sup> /g of<br>dry material,<br>decreasing with<br>material ageing | Not specified                                                                 | High antioxidant<br>capacities relative to<br>those of TROLOX, $\alpha$ -<br>tocopherol or vitamin<br>C                                                                                                 | [6]  |
| <b>Relaxant</b> activity tested<br>on transmurally stimulated<br>guinea-pig ileum <i>in vitro</i> .                                               | Leaves, solvents of<br>different polarity (n-hexane,<br>ethyl acetate, chloroform,<br>MeOH)                                   | Not<br>specified                                                                             | Not specified                                                                 | The methanol<br>extract exhibited the<br>largest response<br>indicating that the<br>active compounds are<br>of a relatively polar<br>nature.                                                            | [7]  |
| <b>Muscle relaxant</b> using<br>transmurally stimulated<br>Guinea pig ileum<br>preparations <i>in vitro</i> .                                     | Leaves, methanolic<br>extract subjected to column<br>chromatographic<br>fractionation with<br>chloroform-methanol<br>mixtures | Not<br>specified                                                                             | Several<br>triterpenoid<br>glycosides                                         | Triterpenoid<br>glycosides displayed<br>significant muscle<br>relaxant activity.                                                                                                                        | [8]  |
| <b>Antioxidant</b><br>ABTS <sup>4</sup><br>DPPH<br>FRAP <sup>5</sup><br><b>Neuroprotective</b>                                                    | Rhizome, 70 % EtOH<br>subsequently partitioned by<br>CH <sub>2</sub> Cl <sub>2</sub>                                          | Not<br>specified                                                                             | Various<br>lignans                                                            | All lignans<br>possessed antioxidant<br>activity.<br><br>Some lignans<br>were effective against<br>H <sub>2</sub> O <sub>2</sub> -induced SH-<br>SY5Y human<br>neurablastoma cell<br>injury (in vitro). | [9]  |
| <b>Antileukaemic</b> <i>in vitro</i><br>against promyelocytic HL60<br>cell line and its multidrug<br>resistant sublines<br>HL60/VINC and HL60/DOX | Leaves, acidified<br>boiling water and thereafter<br>MeOH added to the slurry                                                 | 525 mg/100<br>g dry weight                                                                   | Quercetin,<br>kaempferol, ellagic,<br>gallic, p-coumaric<br>and caffeic acids | High cytotoxic<br>activity.                                                                                                                                                                             | [10] |
| <b>Radical scavenging</b><br>ABTS<br>DPPH                                                                                                         | Leaves, 96 % EtOH                                                                                                             | 4.8 to 12<br>mg GAE in 1 g<br>of extract                                                     | Quercetin<br>glucuronide,<br>quercetin-3-O-<br>glucoside, rutin               | Effective<br>scavengers of radicals                                                                                                                                                                     | [11] |

|                                                                                                                                                                                    |                        |                                                  |                                                                                                                 |                                                                                                                                                                                                       |      |
|------------------------------------------------------------------------------------------------------------------------------------------------------------------------------------|------------------------|--------------------------------------------------|-----------------------------------------------------------------------------------------------------------------|-------------------------------------------------------------------------------------------------------------------------------------------------------------------------------------------------------|------|
| <b>Protective activity</b><br>against degradation of<br>deoxyribose and DNA:<br>Electrophoresis                                                                                    | Leaves, water infusion | Not<br>specified                                 | Not specified                                                                                                   | Moderate<br>effectiveness.                                                                                                                                                                            | [12] |
| <b>Antioxidant:</b><br>in vitro H <sub>2</sub> O <sub>2</sub> -induced<br>haemolysis assay<br><br>assay using the<br>bacteriophage<br>P22/ <i>Salmonella Typhimurium</i><br>system | Leaves, water infusion | Not<br>specified                                 | Not specified                                                                                                   | Effectively<br>prevented human red<br>blood cells from<br>haemolysis.<br><br>High degree of<br>protection of the<br>bacteriophage from<br>the oxidant challenge<br>by H <sub>2</sub> O <sub>2</sub> . | [13] |
| <b>Antioxidant:</b><br>DPPH<br>FRAP<br>ORAC                                                                                                                                        | Leaves, water (98 °C)  | 69 mg of<br>GAE <sup>9</sup> /g of dry<br>sample | Ellagic and<br>gallic acids,<br>catechin,<br>epicatechin,<br>procyanidin B1                                     | About 50% of<br>antioxidant activity of<br>green tea extract used<br>as a reference                                                                                                                   | [14] |
| <b>Antioxidant</b><br>DPPH<br>ABTS<br><br><b>Cytotoxic</b> tested using<br>human laryngeal carcinoma<br>(HEp2) and human<br>adenocarcinoma of the colon<br>(SW 480) cells          | Leaves, boiled water   | 40.6 (mg of<br>GAE/g of dry<br>weight)           | Flavan-3-ols,<br>tannins,<br>hydroxycinnamic<br>acids, ellagic acid<br>derivatives,<br>quercetin<br>derivatives | High antioxidant<br>capacity comparable<br>to that of green tea<br><br>Cell-type specific<br>toxicity, more toxic to<br>SW 480 than HEp2<br>after a prolonged time<br>of exposure                     | [15] |

|                                                                                                           |                                          |                                   |                                                                             |                                                                                                                                                                                                                                          |      |
|-----------------------------------------------------------------------------------------------------------|------------------------------------------|-----------------------------------|-----------------------------------------------------------------------------|------------------------------------------------------------------------------------------------------------------------------------------------------------------------------------------------------------------------------------------|------|
| <b>Antioxidant</b><br>ORAC<br>TRAP <sup>6</sup><br>HORAC <sup>7</sup><br>Inhibition of lipid peroxidation | Leaves, 80% acetone in 0.2 % formic acid | 163 mg of GAE/100 g of dry weight | Epicatechin, rutin, 3,4-dihydroxybenzoic, ellagic, caffeic and gallic acids | Relatively low TRAP antioxidant activity compared to those measured by ORAC and HORAC.                                                                                                                                                   | [16] |
| <b>Antimicrobial</b><br>Agar diffusion assay                                                              |                                          |                                   |                                                                             | Effectively inhibited the autoxidation of linoleic acid                                                                                                                                                                                  |      |
| <b>Neutrophil-modulating activity</b>                                                                     |                                          |                                   |                                                                             | Exhibited antimicrobial activity against <i>Escherichia coli</i> , <i>Salmonella</i> spp., <i>Staphylococcus aureus</i> , <i>Listeria</i> spp., <i>Proteus vulgaris</i> , <i>Pseudomonas aeruginosa</i> , <i>Klebsiella pneumoniae</i> . |      |
|                                                                                                           |                                          |                                   |                                                                             | Blocked the opsonized zymosan particle-activated ROS production by neutrophils from human whole blood.                                                                                                                                   |      |
| <b>Antioxidant</b><br>ABTS<br>DPPH<br>FRAP                                                                | Leaves, 70 % acetone                     | 270 mg GAE/g of dry extract       | Ellagitannins, gallotannins                                                 | Relatively high antioxidant capacities.                                                                                                                                                                                                  | [17] |
| <b>Effects</b> on modulation of the surface membrane expression and activity of endothelial apyrase       |                                          |                                   |                                                                             | Significantly augmented endothelial cell ICAM-1 expression.                                                                                                                                                                              |      |

|                                                                                                                                                                                 |                       |                    |                                                                             |                                                                                                                                                                                                                                                                                                                                          |      |
|---------------------------------------------------------------------------------------------------------------------------------------------------------------------------------|-----------------------|--------------------|-----------------------------------------------------------------------------|------------------------------------------------------------------------------------------------------------------------------------------------------------------------------------------------------------------------------------------------------------------------------------------------------------------------------------------|------|
| (investigated by various methods)                                                                                                                                               |                       |                    |                                                                             |                                                                                                                                                                                                                                                                                                                                          |      |
| <b>Anti-inflammatory</b><br>based on human monocytic leukemia cell line THP-1 derived macrophages model                                                                         | Leaves, water (40 °C) | Not specified      | Ellagitannins metabolized by gut microbiota to urolithins                   | Extract evaluated as potential anti-inflammatory agent                                                                                                                                                                                                                                                                                   | [18] |
| <b>Effects</b> on blood platelet functions                                                                                                                                      | Leaves, 70 % acetone  | Not specified      | Not specified.                                                              | In ADP-stimulated blood, raspberry extracts markedly decreased platelet surface membrane expression of activated GPIIb/IIIa receptor and significantly inhibited platelet aggregation. In platelet-rich plasma (PRP), the extract had no effect on ADP-induced platelet aggregation, modulated blood platelet reactivity in whole blood. | [19] |
| <b>Antioxidant:</b><br>DPPH<br>ABTS<br>FRAP<br>ORAC<br><b>Cytoprotective effect</b><br>tested <i>in vitro</i> on human HepG2 cell line:<br>MTT <sup>s</sup> cell viability test | Leaves, 20 % EtOH     | 32 g % tannic acid | Quercitrin, isoquercitrin, quercetin, p-coumaric, caffeic and ferulic acids | Antioxidant activity was evaluated as modest compared with ascorbic and gallic acids.<br><br>Potential means to treat hepatic disorders associated with oxidative stress.                                                                                                                                                                | [20] |

|                                                                                               |                                                                                                                                 |                                                                                        |                                                                            |                                                                                                                                                                                                                                                                                                                                |      |
|-----------------------------------------------------------------------------------------------|---------------------------------------------------------------------------------------------------------------------------------|----------------------------------------------------------------------------------------|----------------------------------------------------------------------------|--------------------------------------------------------------------------------------------------------------------------------------------------------------------------------------------------------------------------------------------------------------------------------------------------------------------------------|------|
| <b>Antioxidant:</b><br>DPPH<br>SAS <sup>9</sup><br>RP <sup>10</sup><br>MCA <sup>11</sup>      | Leaves, MeOH/water<br>(70:30, v/v)                                                                                              | 84 – 144<br>mg of GAE <sup>9</sup> /g<br>of dry weight<br>depending on<br>the cultivar | Catechin,<br>ellagic acid,<br>epigallocatechin<br>gallate, rutin           | Favorable radical<br>scavenging, capacity,<br>adequate ferric ion<br>reducing power, good<br>superoxide anion<br>radical scavenging,<br>activity, low metal<br>chelating ability.                                                                                                                                              | [21] |
| <b>Antioxidant</b><br>DPPH<br>TRAP<br>ORAC<br><br><b>Antimicrobial</b><br>turbidimetric assay | Leaves, acidified<br>ethanol                                                                                                    | 228 mg<br>GAE/100 ml of<br>extract                                                     | Ellagitannins,<br>flavonol glycosides                                      | Moderate to<br>strong (assay-<br>dependent)<br>antioxidant activity<br>compared to those of<br>tested other plant<br>extracts<br><br>Effective against<br><i>Lysteria monocytogens</i> ,<br>dose-dependent<br>activity against <i>E. coli</i> ,<br><i>S. aureus</i> , <i>Bacillus</i><br><i>cereus</i> , <i>Salmonella</i> sp. | [22] |
| <b>Antioxidant:</b><br>FRAP<br>DPPH                                                           | Leaves, water (100 °C)                                                                                                          | 18 – 27 mg<br>caffeic acid<br>equivalents in 1<br>g of dry weight.                     | Not specified                                                              | Antioxidant<br>activities of extracts<br>were ranked as high<br>and very high<br>depending on<br>raspberry cultivar.                                                                                                                                                                                                           | [23] |
| <b>Anti-toxoplasma<br/>activity</b>                                                           | Aerial parts,<br>concentrated decoction<br>(subjected to serial<br>extraction with various<br>organic solvents for<br>analysis) | Not<br>specified                                                                       | 3-decen-5-one,<br>2-methyl<br>(CAS),carvone,<br>pentadecane,<br>hexadecane | Exhibited anti-<br>toxoplasma activity.                                                                                                                                                                                                                                                                                        | [24] |
| <b>Antioxidant</b><br>DPPH                                                                    | Leaves, MeOH                                                                                                                    | 60 – 97 mg<br>of GAE/g of<br>extract                                                   | Flavonoids,<br>tannins (not<br>specified)                                  | High level of<br>antioxidant activity<br>positively correlating                                                                                                                                                                                                                                                                | [25] |

|                                                                                                                                      |                                                               |                                          |                                                                                                                                                                                                                                                                                                 |                                                                                                                                                                                                                                                                                                                                                                                                                                                                                                                                                                       |      |
|--------------------------------------------------------------------------------------------------------------------------------------|---------------------------------------------------------------|------------------------------------------|-------------------------------------------------------------------------------------------------------------------------------------------------------------------------------------------------------------------------------------------------------------------------------------------------|-----------------------------------------------------------------------------------------------------------------------------------------------------------------------------------------------------------------------------------------------------------------------------------------------------------------------------------------------------------------------------------------------------------------------------------------------------------------------------------------------------------------------------------------------------------------------|------|
| <b>Antimicrobial:</b><br>microdilution method                                                                                        |                                                               | depending on<br>the growth<br>conditions | with total amount of<br>polyphenols.<br><br>More effective<br>against Gram-negative<br>( <i>E. coli</i> ) bacteria<br>compared to Gram-<br>positive ( <i>Sarcina lutea</i> ,<br><i>Bacillus subtilis</i> ).<br><br>Negative<br>correlation between<br>anticancer and<br>antioxidant activities. |                                                                                                                                                                                                                                                                                                                                                                                                                                                                                                                                                                       |      |
| <b>Anticancer</b> using<br>human colorectal cancer cell<br>line HCT-116:<br>cell viability and<br>proliferation assay (MTT<br>assay) |                                                               |                                          |                                                                                                                                                                                                                                                                                                 |                                                                                                                                                                                                                                                                                                                                                                                                                                                                                                                                                                       |      |
| <b>Antioxidant</b><br>DPPH<br><br><b>Antimicrobial</b><br>microwell dilution                                                         | Leaves,<br>MeOH/acetone/water/acetic<br>acid (30/42/27.5/0.5) | 98 mg<br>GAE/g of dry<br>material        | Quercetin<br>glucoside, ellagic<br>acid, rutin,<br>kaempferol-3-<br>glucoside, quercetin                                                                                                                                                                                                        | High level of<br>antioxidant activity.<br><br>More effective<br>against Gram-positive<br>( <i>Clostridium</i><br><i>perfringens</i> , <i>Bacillus</i><br><i>cereus</i> , <i>Listeria</i><br><i>monocytogenes</i> ,<br><i>Staphylococcus aureus</i><br><i>Sarcina lutea</i> ,<br><i>Micrococcus flavus</i> )<br>bacteria compared to<br>Gram-negative<br>( <i>Escherichia coli</i> ,<br><i>Pseudomonas</i><br><i>aeruginosa</i> , <i>Salmonella</i><br><i>enteritidis</i> , <i>Shigella</i><br><i>sonnei</i> , <i>Klebsiella</i><br><i>pneumoniae</i> , <i>Proteus</i> | [26] |

|                                                                                                |                                                                                                            |                                                                                                               |                                                                                 |                                                                                |                                                               |
|------------------------------------------------------------------------------------------------|------------------------------------------------------------------------------------------------------------|---------------------------------------------------------------------------------------------------------------|---------------------------------------------------------------------------------|--------------------------------------------------------------------------------|---------------------------------------------------------------|
|                                                                                                |                                                                                                            |                                                                                                               |                                                                                 |                                                                                | <i>vulgaris</i> ) strains and yeast <i>Candida albicans</i> . |
| Antioxidant<br>ABTS                                                                            | Leaves, 80 % MeOH                                                                                          | 120 – 136<br>mg in 100 g of<br>fresh material<br>depending on<br>the cultivar<br>(organic or<br>conventional) | p-coumaric<br>and ellagic acids,<br>quercetin glucoside,<br>quercetin, luteolin | Organic leaves<br>were characterized by<br>higher antioxidant<br>activity.     | [27]                                                          |
| <b>Antioxidant</b><br>DPPH<br>ABTS<br>HORAC<br>FRAP                                            | Leaves, various<br>solvents (50 % EtOH, 100 %<br>EtOH, 50 % MeOH, 100%<br>MeOH, ethyl acetate,<br>acetone) | Up to 64<br>mg GAE/g of<br>dry weight,<br>depending on<br>the solvent                                         | Gallic and<br>ellagic acids,<br>procyanidin B3                                  | The higher total<br>phenolic amounts, the<br>stronger antioxidant<br>activity. | [28]                                                          |
| <b>Antidiabetic</b> using<br>digestive enzymes $\alpha$ -<br>glucosidase and $\alpha$ -amylase |                                                                                                            |                                                                                                               |                                                                                 | Potential<br>inhibitors of digestive<br>enzymes.                               |                                                               |

<sup>1</sup> 2,2'-diphenyl-1-picrylhydrazyl) radical.

<sup>2</sup> Oxygen radical absorbance capacity.

<sup>3</sup> Gallic acid equivalent.

<sup>4</sup> 2'2'-azinebis-3-ethylbenzothiazolin-6-sulfonic acid.

<sup>5</sup> Ferric reducing antioxidant capacity.

<sup>6</sup> Total peroxyl-radical antioxidant parameter.

<sup>7</sup> Hydroxyl radical averting capacity.

<sup>8</sup> Dimethylthiazol-diphenyltetrazolium bromide.

<sup>9</sup> Superoxide anion radical scavenging activity.

<sup>10</sup> Reducing power.

<sup>11</sup> Metal chelating ability.



**Table S2.** Content (g) of residuals obtained from leaves and stems of *R. idaeus* by decoction and extraction with different organic solvents.

| Solvent                                            | CH <sub>2</sub> Cl <sub>2</sub> | CH <sub>3</sub> OH   | CH <sub>3</sub> OH/H <sub>2</sub> O<br>(1:1) | Decoction                                       |
|----------------------------------------------------|---------------------------------|----------------------|----------------------------------------------|-------------------------------------------------|
| Compounds                                          | Nonpolar                        | Moderate<br>polarity | Polar                                        |                                                 |
| Residuals from <i>R. idaeus</i> leaf<br>extract, g | 0.5805 ± 0.0910                 | 2.0825 ± 0.2132      | 3.835 ± 0.3102                               | 0.4623 ± 0.0405 <sup>1</sup><br>3.5580 ± 0.2743 |
| Residuals from <i>R. idaeus</i> stem<br>extract, g | 0.3101 ± 0.0285                 | 1.9258 ± 0.1122      | 0.7631 ± 0.0930                              | 2.2350 ± 0.1888                                 |

Decoction for 30 min,

<sup>1</sup>Duration of decoction procedure was 15 min

**Table S3.** Total polyphenolic content in various *R. idaeus* leaf extracts

| Extract                                         | Mean values of Total phenolic content, mg GAEg <sup>-1</sup> | Country        | Reference |
|-------------------------------------------------|--------------------------------------------------------------|----------------|-----------|
| Leaves, phosph. buff. pH 7.0, 4 °C              | 11 to 32 (fresh leaves), 47 to 129 (dried leaves)            | USA            | [6]       |
| Leaves, 96% EtOH                                | 4.8 to 12 (dried)                                            | Lithuania      | [11]      |
| Leaves, hot H <sub>2</sub> O                    | 69 (dried)                                                   | Czech Republic | [14]      |
| Leaves, H <sub>2</sub> O                        | 41 (dried)                                                   | Croatia        | [15]      |
| Leaves, 20% EtOH                                | 32 (expressed in g% tannic acid, dried)                      | Romania        | [20]      |
| Leaves, MeOH:H <sub>2</sub> O (70:30)           | 85 to 144 (depending on the cultivar, dried)                 | Serbia         | [21]      |
| Fresh leaves, EtOH/H <sub>2</sub> O/acetic acid | 2183 (100 g fresh)                                           | Finland        | [22]      |
| Leaves, water 100 °C                            | 18 to 27 (dried)                                             | Poland         | [23]      |

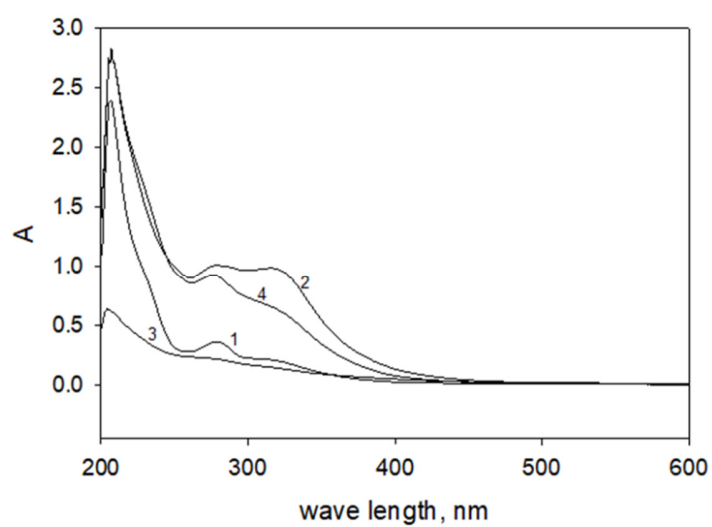

**Figure S1.** UV/VIS spectra of diluted (1:50) leaf (1, 2) and stem (3, 4) *R. idaeus* extracts in phosphate buffer pH 6.0.

The effect of the sample ageing is shown in Figure S1 by comparing UV/VIS spectra of extracts prepared from stems and leaves stored about a year at room temperature (Figure S1, curves 1, 3) and extracts prepared within 2 months after gathering-drying procedures (Figure S1, curves 2, 4).

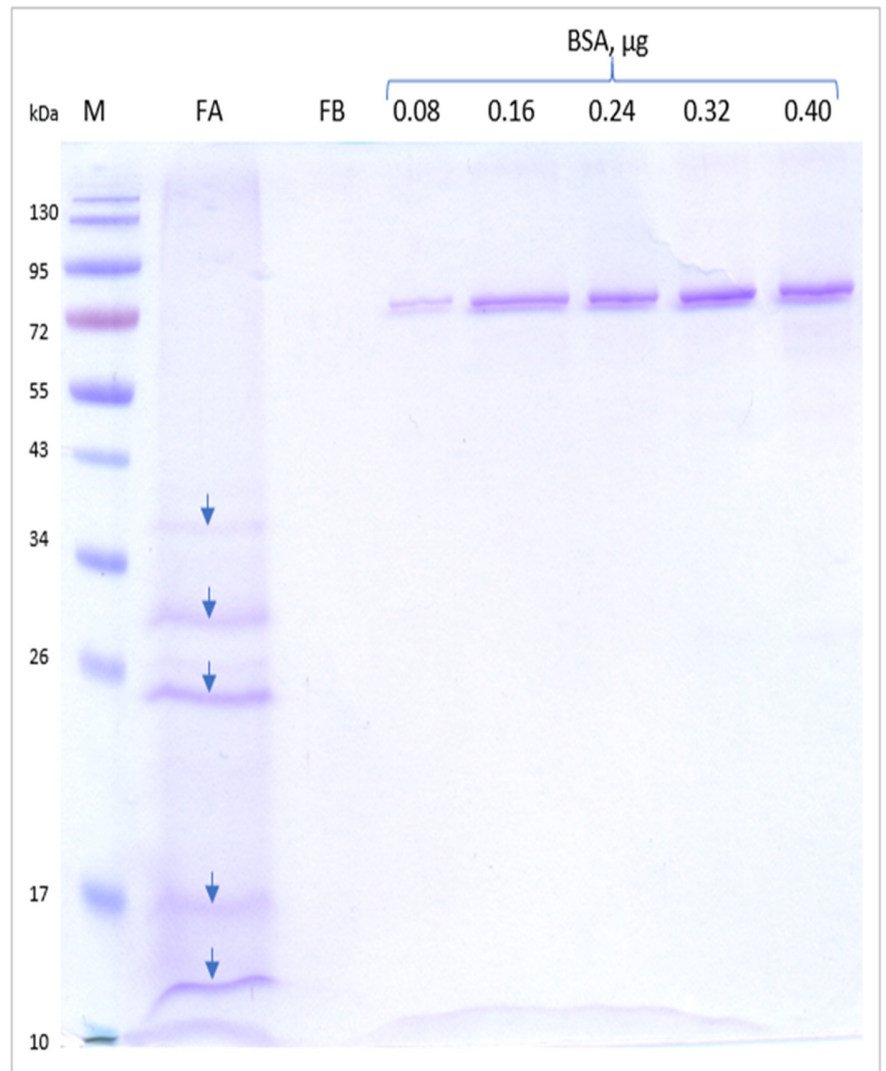

**Figure S2.** Coomassie stained SDS-PAGE of crude *R. idaeus* plant extract and BSA standard. M – PageRuler Prestained protein ladder, FA – fraction collected after extraction and filtering of raspberry bark, FB – fraction of solution bypassed centrifugal filter, BSA – Bovine serum albumin. Bands corresponding to extracted proteins are marked by arrows.

The amount of extracted proteins could be evaluated by visual comparison of band of unknown protein versus BSA band.

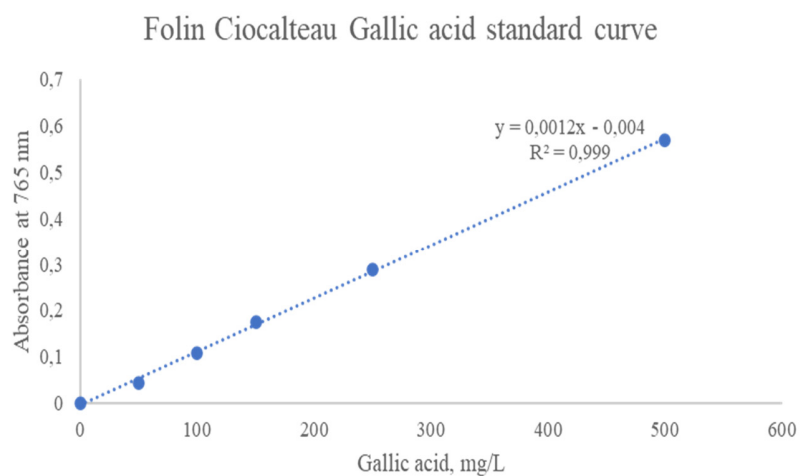

**Figure S3.** Gallic acid standard calibration curve.

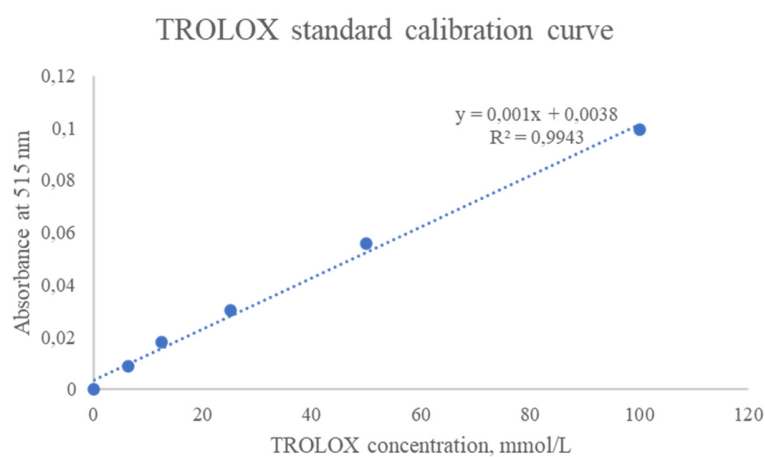

**Figure S4.** TROLOX standard calibration curve.

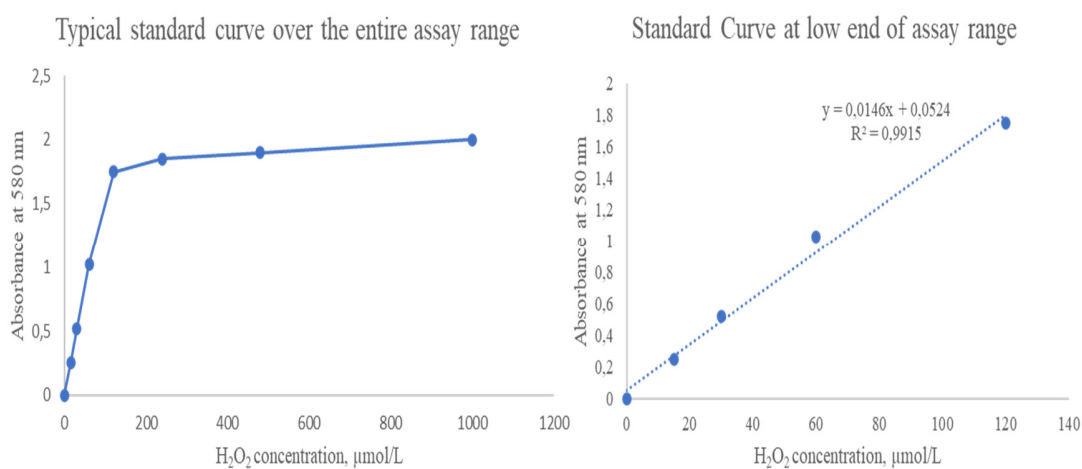

**Figure S5.** Hydrogen peroxide standard calibration curves.
